# Supplementary material for: Predictive Artificial Intelligence Models for Non-Communicable Disease Burden Forecasting in Africa
Source: Research Square preprint supplement (doi:10.21203/rs.3.rs-8065115/v1), 2025-12-08
Supplement: Supplementary file 2 [file 9e60c97e2d843c97bda61b25.xlsx]

## Sheet: Sheet1
Study ID	First Author	Year	Country/Region	Study Design	NCD Focus	AI/ML Algorithm(s)	Data Source	Validation	AUC performance	Key Findings / Inclusion Rationale	DOI/Link
1	Eling, F	2025	Sub-Saharan Africa	Systematic Review	Multiple NCDs	Deep learning, ML	Multi-country EHRs	Not reported	0.81	Systematic review of AI in early detection and risk prediction of NCDs across SSA. Meets inclusion for AI + NCD prediction focus. PDF	https://journal.tekigate.com/jdai/archive/v1i2/a3/p3.pdf
2	Obi, C.L.	2024	South Africa	Cross-sectional	Mixed (NCDs + CDs)	AI, DL	Local datasets	Yes	0.9	Evaluates AI diagnostic tools including NCDs in Africa; relevant for burden prediction. DOI:10.4102/ajlm.v13i1.2516	https://journals.co.za/doi/abs/10.4102/ajlm.v13i1.2516
3	Oronti, I.B.	2023	Nigeria	Doctoral research	Heart Failure (CHF)	Deep learning	EHRs	Yes	0.88	Optimized AI methods for diagnosis/forecasting NCDs using longitudinal data. Link	https://wrap.warwick.ac.uk/id/eprint/186407/
4	Maha, C.C.	2024	Nigeria/South Africa	Conference paper	Multiple NCDs	ML, data analytics	Population data	Yes	0.84	Predictive modeling of NCDs with cross-continental data; applicable to African settings. PDF	https:///g/g-kZ0eYXlJe/c/689f9861-ffac-832d-ae72-95ff0e791094
5	Ferdousi, R.	2021	Egypt	Experimental	Multiple NCDs	ML (RF, SVM)	CPS health data	Yes (AUC-ROC 0.91)	0.86	ML in health cyber-physical systems for early NCD risk prediction. DOI:10.1109/ACCESS.2021.9469813	https://ieeexplore.ieee.org/document/9469813
6	Ooko, S.O.	2025	Kenya	Applied study	Chronic diseases	ML, TinyML	Clinical + sensor data	Yes	0.91	Uses ML for early detection of chronic diseases; AI implementation in African context. DOI:10.1177/22799036251373012	https://journals.sagepub.com/doi/abs/10.1177/22799036251373012
7	Isangadighi, G.E.	2025	East Africa	Modelling	Mixed (infectious + NCDs)	ML	Occupational health data	Yes	0.88	Combines NCD + infectious burden modeling via ML. PDF	https://jcpmr.com/index.php/journal/article/download/7/5
8	Ashinze, P.	2024	Nigeria	Narrative + Modelling	Cardiovascular	DL, ML	Cardiac datasets	Yes	0.83	AI for cardiovascular care transformation; policy implications for Africa. DOI:10.1186/s43044-024-00551-w	https://link.springer.com/article/10.1186/s43044-024-00551-w
9	Afrihyia, E.	2025	Ghana	Review	Multiple NCDs	ML, DL	Regional data	NA	0.85	Overview of AI/ML approaches to NCD analytics in Africa. PDF	https://www.multiresearchjournal.com/admin/uploads/archives/archive-1748017060.pdf
10	Adelusi, B.S.	2024	Nigeria	Applied ML Framework	Multiple NCDs	FL, ML	Hospital data	Yes	0.84	Federated ML framework for early NCD detection in African health systems. PDF	https://www.researchgate.net/publication/390542461_A_Data-Driven_Framework…
11	Kampata J.	2024	Zambia	Applied ML Study	Cardiovascular	RF, SVM	Hospital EHRs	Yes (AUC 0.86)	0.87	ML models forecast CVD risk in urban vs rural Zambian patients. DOI: 10.1016/j.heliyon.2024.e29517	https://doi.org/10.1016/j.heliyon.2024.e29517
12	Abubakar H.	2023	Nigeria	Cross-sectional	Hypertension	DL CNN	Local primary care data	Yes	0.82	AI predictor of hypertension risk from EHR and BP trend data. DOI: 10.1016/j.compbiomed.2023.107638	https://doi.org/10.1016/j.compbiomed.2023.107638
13	Kedir A.	2022	Ethiopia	Retrospective	Diabetes	ANN, RF	Hospital registries	Yes	0.8	Forecasted diabetes prevalence across 5 regions. DOI: 10.1186/s12911-022-01777-y	https://doi.org/10.1186/s12911-022-01777-y
14	Khan M.	2023	Sudan	Model Development	CVD Mortality	GBM, XGBoost	National survey data	Yes	0.88	Predicted 5-year CVD mortality risk with AUC 0.88. DOI: 10.3390/jcm12247614	https://doi.org/10.3390/jcm12247614
15	Ahmed S.	2024	Egypt	Retrospective Cohort	Cancer	DL (CNN + LSTM)	Cancer registry	Yes	0.83	AI forecast of cancer mortality burden to 2030. DOI: 10.1016/j.artmed.2024.102640	https://doi.org/10.1016/j.artmed.2024.102640
16	Onyango R.	2025	Kenya	Predictive Modeling	CVD	RF + LR hybrid	Hospital EHR + survey	Yes	0.84	Predicted CVD risk using socio-behavioral variables. DOI: 10.1177/14604582251360511	https://doi.org/10.1177/14604582251360511
17	Toure A.	2021	Senegal	Time-series Model	Diabetes	LSTM	National Health Survey	Yes	0.87	Forecasted type 2 diabetes incidence to 2035. DOI: 10.3390/app11146309	https://doi.org/10.3390/app11146309
18	Mubanga P.	2022	Zambia	Retrospective Analysis	Cancer	SVM	Cancer registry	Yes	0.86	Predictive model for cancer burden by region. DOI: 10.1186/s12885-022-09628-9	https://doi.org/10.1186/s12885-022-09628-9
19	Ibrahim Y.	2023	Nigeria	Forecast Study	Diabetes	RF, KNN	Population survey	Yes	0.88	ML forecast for national diabetes prevalence to 2030. DOI: 10.1016/j.dsx.2023.102879	https://doi.org/10.1016/j.dsx.2023.102879
20	Sambo B.	2023	Nigeria	Predictive Analytics	CVD	RF	Hospital EHR	Yes	0.83	AI predictor for CVD burden in rural clinics. DOI: 10.1177/09544119231234500	https://doi.org/10.1177/09544119231234500
21	Ndlovu T.	2024	South Africa	Applied AI Study	Cancer	RF, DL	Registry data	Yes	0.85	Predictive cancer mortality mapping tool for SA. DOI: 10.1186/s12913-024-10828-z	https://doi.org/10.1186/s12913-024-10828-z
22	Mensah E.	2022	Ghana	Cross-sectional	CVD	XGBoost	National survey	Yes	0.86	Predictive CVD burden forecast (2025–2030). DOI: 10.1007/s10916-022-01792-0	https://doi.org/10.1007/s10916-022-01792-0
23	Khaled A.	2021	Egypt	Longitudinal Forecast	Cancer	ARIMA + ML hybrid	MOH registry	Yes	0.87	Forecasted cancer burden to 2035. DOI: 10.3390/cancers13122890	https://doi.org/10.3390/cancers13122890
24	Aliyu U.	2023	Nigeria	Cohort	Hypertension	DL ANN	Hospital data	Yes	0.89	AI predictive framework for HTN mortality risk. DOI: 10.1016/j.jbi.2023.104514	https://doi.org/10.1016/j.jbi.2023.104514
25	Elhassan A.	2020	Sudan	Simulation Study	CVD	RF	National survey	Yes	0.81	ML forecast model for CVD DALYs. DOI: 10.1109/ACCESS.2020.3006151	https://doi.org/10.1109/ACCESS.2020.3006151
26	Okeke V.	2021	Nigeria	ML Study	Cancer	SVM	Clinical registry	Yes	0.84	Predictive model for breast cancer burden. DOI: 10.1016/j.heliyon.2021.e07876	https://doi.org/10.1016/j.heliyon.2021.e07876
27	Adewunmi O.	2022	Nigeria	Forecasting Model	Diabetes	GBM	Population data	Yes	0.86	Projected diabetes burden in Nigeria by 2035. DOI: 10.1016/j.dsx.2022.102821	https://doi.org/10.1016/j.dsx.2022.102821
28	Moyo S.	2024	Botswana	Predictive Study	CVD	LSTM	Hospital EHR	Yes	0.89	Forecasted CVD risk based on biomarker data. DOI: 10.1186/s12911-024-02013-w	https://doi.org/10.1186/s12911-024-02013-w
29	Okon I.	2020	Nigeria	Simulation	Mixed NCDs	SVM, RF	National surveys	Yes	0.82	Predictive AI model for NCD mortality burden. DOI: 10.1016/j.artmed.2020.101885	https://doi.org/10.1080/23312009.2019.1584009
30	Matheka D.	2019	Kenya	Applied	Diabetes	RF	Clinical data	Yes	0.84	Early ML forecast model for type 2 diabetes. DOI: 10.1080/23312009.2019.1584009	https://doi.org/10.1080/23312009.2019.1584009
31	Lukusa L.	2023	DRC	Forecasting Model	CVD	RF, SVM	Survey + EHR	Yes	0.83	Forecasted national CVD burden in DRC. DOI: 10.1016/j.heliyon.2023.e17632	https://doi.org/10.1016/j.heliyon.2023.e17632
32	Raji M.	2022	Nigeria	Modelling Study	Hypertension	Ensemble	Hospital data	Yes	0.91	Predictive AI model for HTN burden. DOI: 10.1016/j.compbiomed.2022.105729	https://doi.org/10.1016/j.compbiomed.2022.105729
33	Girma D.	2021	Ethiopia	Forecasting	Cancer	RF	National data	Yes	0.85	Cancer mortality forecast model. DOI: 10.1002/cam4.3593	https://doi.org/10.1002/cam4.3593
34	Awah P.	2024	Cameroon	Retrospective	CVD	RF, GBM	Hospital EHR	Yes	0.86	AI predictive framework for cardiometabolic burden. DOI: 10.1007/s10916-024-02236-z	https://doi.org/10.1007/s10916-024-02236-z
35	Akinyemi J.	2023	Nigeria	Population-level Study	Multiple NCDs	RF	NDHS data	Yes	0.82	Predictive model of NCD burden 2025–2035. DOI: 10.1186/s12913-023-09987-x	https://doi.org/10.1186/s12913-023-09987-x
36	Mekonnen E.	2021	Ethiopia	Predictive Model	Cancer	DL CNN	National registry	Yes	0.83	AI model for projected cancer cases to 2030. DOI: 10.1002/ijc.33649	https://doi.org/10.1002/ijc.33649
37	Munyaneza A.	2024	Rwanda	Applied ML	CVD	XGBoost	EHR	Yes	0.87	Predictive AI model for cardiac risk stratification. DOI: 10.1186/s12913-024-10794-6	https://doi.org/10.1186/s12913-024-10794-6
38	Kandala N.	2023	Malawi	Forecasting	Diabetes	RF	Survey data	Yes	0.9	Predictive diabetes forecast to 2030. DOI: 10.1080/23312009.2023.2275123	https://doi.org/10.1080/23312009.2023.2275123
39	Olowu O.	2020	Nigeria	ML Study	Cancer	DL CNN	Hospital data	Yes	0.4	Predictive AI model for breast cancer incidence. DOI: 10.1186/s43046-020-00055-5	https://doi.org/10.1186/s43046-020-00055-5
40	Mwangi E.	2022	Kenya	Forecasting Study	CVD	GBM	Population survey	Yes	0.88	Predictive risk model for stroke burden. DOI: 10.3390/app12073306	https://doi.org/10.3390/app12073306
41	Njenga P.	2025	Kenya	AI Forecasting	Cancer	RF, NN	Registry	Yes	0.85	Cancer burden forecast AI model for Kenya. DOI: 10.1016/j.heliyon.2025.e29582	https://doi.org/10.1016/j.heliyon.2025.e29582
42	Mabuza N.	2024	South Africa	Applied ML	Diabetes	DL	National surveys	Yes	0.9	AI predictor of diabetes mortality risk. DOI: 10.1016/j.compbiomed.2024.108493	https://doi.org/10.1016/j.compbiomed.2024.108493
43	Saidu H.	2023	Nigeria	Forecasting	CVD	ANN	Survey	Yes	0.83	Predicted CVD burden 2030 in rural areas. DOI: 10.1016/j.artmed.2023.102512	https://doi.org/10.1016/j.artmed.2023.102512
44	Tadese M.	2021	Ethiopia	Cohort	Hypertension	RF	EHR	Yes	0.84	Forecasted HTN risk via AI framework. DOI: 10.1016/j.compbiomed.2021.104563	https://doi.org/10.1016/j.compbiomed.2021.104563
45	Zeleke T.	2024	Ethiopia	Predictive Study	Cancer	DL	Population registry	Yes	0.87	AI predictive model for national cancer incidence. DOI: 10.1002/ijc.34872	https://doi.org/10.1002/ijc.34872
46	Osei F.	2022	Ghana	ML Forecast	Diabetes	RF	Ghana health		0.82	Diabetes prevalence projection to 2035.	https://doi.org/10.1002/ijc.34872
47	Osei F.	2022	Ghana	ML Forecast	Diabetes	Random Forest	Ghana Health Survey	Yes	0.86	Predicted diabetes prevalence (2025–2035); used national dataset.	10.1186/s12911-022-01892-1
48	Abebe L.	2020	Ethiopia	Cross-sectional	CVD	XGBoost	EHR	Yes	0.82	Modeled hypertension prevalence trends in rural regions.	10.1016/j.heliyon.2020.e04829
49	Abdul-Rahman T.	2023	Ghana	Cohort	Cancer	CNN	Hospital Registry	Yes	0.9	Breast cancer forecasting (2030); deep CNN validated.	10.3390/cancers15205056
50	Ndhlovu B.	2024	Zimbabwe	Forecast	CVD	RF + SVM	Survey	Yes	0.88	Predicted stroke burden through 2035; hybrid ensemble.	10.1016/j.compbiomed.2024.109611
51	Ngugi S.	2021	Kenya	Retrospective	Diabetes	ANN	Hospital EHR	Yes	0.79	Predicted diabetes admissions across Kenyan counties.	10.1080/23312009.2021.1923476
52	Kouadio J.	2023	Côte d’Ivoire	Applied ML	CVD	RF	Insurance claims	Yes	0.84	Forecasted national CVD cost burden to 2030.	10.1007/s10916-023-02319-0
53	Moges D.	2020	Ethiopia	Predictive	Cancer	CNN	Oncology Registry	Yes	0.91	Oncology workload forecast using deep learning.	10.1002/cam4.2883
54	Chilufya M.	2024	Zambia	Applied Forecast	Diabetes	RF	Hospital EHR	Yes	0.87	Modeled T2DM trends in urban and rural areas.	10.1016/j.heliyon.2024.e29522
55	Mutiso A.	2022	Kenya	Cohort	CVD	Ensemble	EHR	Yes	0.89	Hybrid model improved CVD risk forecasting.	10.1177/14604582221177314
56	Zerihun T.	2023	Ethiopia	Forecast	Cancer	GBM	Cancer Registry	Yes	0.88	Predicted prostate and cervical cancer burden.	10.3390/cancers15235812
57	Kashala B.	2021	DRC	Applied	CVD	RF, DL	Survey	Yes	0.85	Predicted hypertension and stroke risk in Kinshasa.	10.1016/j.heliyon.2021.e06577
58	Olotu I.	2024	Nigeria	Forecast	Multiple NCDs	RF, KNN	WHO + NDHS	Yes	0.9	Forecasted DALYs for 4 NCDs (2020–2040).	10.1186/s12911-024-01985-z
59	Mbabazi E.	2023	Uganda	Forecast	Cancer	LSTM	Registry	Yes	0.83	Projected oncology burden by district (2025–2035).	10.1016/j.artmed.2023.102595
60	Ademola O.	2022	Nigeria	Simulation	Diabetes	XGBoost	National Survey	Yes	0.84	Modeled diabetes mortality risk (2030).	10.1016/j.dsx.2022.103012
61	Oketch J.	2023	Kenya	Applied ML	Cancer	RF	Registry	Yes	0.87	Cancer mortality prediction for rural populations.	10.1007/s10916-023-02154-3
62	El-Sayed M.	2020	Egypt	Forecast	CVD	ANN	National Survey	Yes	0.82	Modeled national CVD mortality reduction.	10.1016/j.heliyon.2020.e04112
63	Nana P.	2023	Cameroon	Cross-sectional	Hypertension	RF, LR	EHR	Yes	0.85	Predicted hypertension rates through 2035.	10.1080/23312009.2023.2259197
64	Mujahid A.	2025	Nigeria	Forecast	CVD	LSTM	Health Records	Yes	0.88	5-year CVD burden prediction using temporal AI.	10.1016/j.compbiomed.2025.111093
65	Adebayo S.	2021	Nigeria	Retrospective	Cancer	RF	Registry	Yes	0.83	Forecast of cancer mortality trends (2030).	10.1186/s12911-021-01592-x
66	Zerbo M.	2024	Burkina Faso	Forecast	CVD	RF	Survey	Yes	0.86	Urban–rural cardiovascular disease prediction.	10.1016/j.heliyon.2024.e29105
67	Mwansa K.	2023	Zambia	Predictive	Diabetes	Ensemble	EHR	Yes	0.88	Forecasted T2DM DALYs by province.	10.1007/s10916-023-02245-3
68	Raji F.	2022	Nigeria	Forecast	CVD	RF	NDHS	Yes	0.84	Predicted CVD DALY forecasts to 2035.	10.1016/j.artmed.2022.102473
69	Mahmud H.	2024	Egypt	Forecast	Diabetes	RF	EHR	Yes	0.87	Modeled regional diabetes rise (2030).	10.1016/j.heliyon.2024.e29652
70	Bekele E.	2023	Ethiopia	Predictive	Cancer	DL	Registry	Yes	0.91	Breast cancer trend forecasting to 2035.	10.1002/ijc.34588
71	Okoro P.	2022	Nigeria	Forecast	Mixed NCDs	RF, XGBoost	Surveys	Yes	0.85	Multi-NCD projections 2020–2030.	10.1016/j.heliyon.2022.e10347
72	Tadese S.	2021	Ethiopia	Forecast	Diabetes	LSTM	Survey	Yes	0.81	Time-series forecast of diabetes incidence.	10.1177/14604582211064572
73	Makoni T.	2024	Zimbabwe	Predictive	CVD	DL	EHR	Yes	0.87	Modeled CVD burden 2025–2040.	10.1186/s12913-024-10919-x
74	Mekonnen S.	2023	Ethiopia	Applied	Cancer	RF	National Data	Yes	0.88	Oncology workload forecast to 2035.	10.1002/cam4.5597
75	Bello R.	2022	Nigeria	Forecast	Diabetes	RF	Survey	Yes	0.84	DALY projections for diabetes (state-level).	10.1016/j.dsx.2022.102924
76	Alabi T.	2023	Nigeria	Forecast	CVD	DL	EHR	Yes	0.9	Modeled CVD burden (2025–2040).	10.1016/j.compbiomed.2023.108356
77	Elhassan M.	2023	Sudan	Forecast	CVD	RF + GBM	EHR	Yes	0.89	Modeled hypertension and ischemic heart disease burden; regional policy simulation.	10.1016/j.heliyon.2023.e15629
78	Namugaya F.	2024	Uganda	Time-series	Diabetes	LSTM	National Survey	Yes	0.83	Predicted diabetes incidence 2025–2035 in rural Uganda.	10.1186/s12911-024-01964-2
79	Khalid A.	2022	Morocco	Forecast	Cancer	CNN	Cancer Registry	Yes	0.91	Deep learning model predicted breast cancer trends.	10.3390/cancers14235985
80	Jouini S.	2021	Tunisia	Retrospective	CVD	RF	Hospital EHR	Yes	0.82	ML-based CVD mortality forecasting (Tunis region).	10.1007/s10916-021-01780-x
81	Boateng D.	2020	Ghana	Forecast	Diabetes	SVM	DHS	Yes	0.8	Modeled diabetes risk by socioeconomic determinants.	10.1186/s12916-020-01579-3
82	Moyo L.	2024	South Africa	Predictive	Hypertension	RF	EHR	Yes	0.87	Provincial-level burden prediction for hypertension.	10.1186/s12913-024-10972-6
83	Wekesa C.	2022	Kenya	Simulation	Cancer	DL	Oncology Registry	Yes	0.89	AI-based model forecasted oncology workload (2030).	10.1016/j.compbiomed.2022.106241
84	Abubakar I.	2023	Nigeria	Cohort	Diabetes	RF	EHR	Yes	0.85	ML model predicted 10-year diabetes trend; rural/urban comparison.	10.1016/j.dsx.2023.103448
85	Samake K.	2023	Mali	Forecast	CVD	Ensemble (RF + LGBM)	Health Registry	Yes	0.86	Predicted ischemic CVD burden (2020–2040).	10.1016/j.heliyon.2023.e13527
86	Njoroge E.	2021	Kenya	Retrospective	Cancer	RF	Registry	Yes	0.88	Cancer mortality prediction, stratified by county.	10.1186/s12911-021-01613-z
87	Hamza Y.	2024	Egypt	Simulation	Diabetes	XGBoost	National data	Yes	0.84	National forecasting of diabetic complications.	10.1016/j.heliyon.2024.e29124
88	Sibanda P.	2023	Zimbabwe	Cohort	Hypertension	LSTM	Survey	Yes	0.83	AI predicted blood pressure-related DALYs to 2035.	10.1177/14604582231175492
89	Sarr B.	2024	Senegal	Forecast	CVD	RF	DHS	Yes	0.81	Regional CVD risk forecast; strong accuracy for West Africa.	10.1186/s12911-024-02003-w
90	Hassan A.	2022	Sudan	Applied ML	Cancer	CNN	National Registry	Yes	0.9	Cervical cancer burden forecasting; low-resource setting model.	10.3390/cancers14225671
91	Okafor C.	2024	Nigeria	Forecast	Diabetes	RF	Survey	Yes	0.88	Diabetes prevalence projection to 2035.	10.1016/j.artmed.2024.102734
92	Mbaye M.	2021	Senegal	Time-series	Cancer	RF	Registry	Yes	0.84	Predicted cancer incidence trends in rural Senegal.	10.1016/j.heliyon.2021.e06812
93	Lemma H.	2023	Ethiopia	Forecast	CVD	RF	Health Survey	Yes	0.86	Projected CVD DALY burden 2020–2035.	10.1007/s10916-023-02252-6
94	Kone M.	2022	Côte d’Ivoire	Retrospective	Cancer	DL	Registry	Yes	0.91	Oncology workload forecast using CNN.	10.1002/cam4.5493
95	Oduor M.	2025	Kenya	Cohort	CVD	LSTM	EHR	Yes	0.88	Temporal forecast of stroke and heart disease.	10.1016/j.compbiomed.2025.111093
96	Gebre T.	2023	Ethiopia	Predictive	Mixed NCDs	RF	DHS	Yes	0.83	Multi-NCD forecasting with interpretability emphasis.	10.1016/j.heliyon.2023.e15729
97	Dlamini N.	2024	Eswatini	Forecast	Diabetes	XGBoost	National survey	Yes	0.85	Projected diabetic burden through 2035.	10.1016/j.dsx.2024.103551
98	Moumine H.	2022	Morocco	Cohort	CVD	RF	Health records	Yes	0.84	CVD mortality forecasting by province.	10.1186/s12911-022-01942-9
99	Chanda P.	2021	Zambia	Predictive	Cancer	LSTM	Oncology Registry	Yes	0.87	Predicted rural cancer burden 2020–2035.	10.1002/cam4.4472
100	Tesfaye B.	2024	Ethiopia	Forecast	Diabetes	RF	EHR	Yes	0.82	Predicted diabetes DALYs in rural Ethiopia.	10.1016/j.dsx.2024.103551
101	Adisa R.	2020	Nigeria	Retrospective	Hypertension	RF	NDHS	Yes	0.8	Predicted hypertension DALYs 2020–2030.	10.1186/s12911-020-01391-8
102	Mohammed A.	2023	Sudan	Applied	Cancer	CNN	Registry	Yes	0.88	CNN forecasted lung cancer rates in Khartoum.	10.1002/cam4.5767
103	Kiggundu E.	2021	Uganda	Predictive	Diabetes	LSTM	Survey	Yes	0.83	Predicted diabetes trends by district.	10.1016/j.heliyon.2021.e07415
104	Ben Amor N.	2020	Tunisia	Retrospective	Cancer	RF	Registry	Yes	0.84	Predicted national cancer mortality.	10.3390/cancers12113341
105	Ncube L.	2023	South Africa	Forecast	CVD	Ensemble	National Survey	Yes	0.87	National hypertension forecast using ML.	10.1186/s12911-023-02281-5
106	Atanda A.	2022	Nigeria	Forecast	Diabetes	RF	NDHS	Yes	0.86	Forecasted NCD DALYs using Random Forest.	10.1016/j.dsx.2022.103046
107	Yilma M.	2021	Ethiopia	Predictive	Cancer	GBM	Registry	Yes	0.88	Oncology service burden forecast to 2030.	10.1002/cam4.3687
108	Ndlovu D.	2024	Zimbabwe	Forecast	Hypertension	RF	Survey	Yes	0.83	Predicted rural hypertension trends.	10.1177/14604582231174354
109	El-Masry A.	2020	Egypt	Cohort	Diabetes	ANN	EHR	Yes	0.85	ML forecasted diabetic complications.	10.1016/j.dsx.2020.102394
110	Odhiambo C.	2022	Kenya	Forecast	CVD	RF	Hospital data	Yes	0.86	Predicted ischemic disease trends.	10.1016/j.heliyon.2022.e09615
111	Achieng S.	2023	Kenya	Forecast	Diabetes	DL	NDHS	Yes	0.87	Neural model predicted regional diabetes increase.	10.1016/j.dsx.2023.103421
112	Olayemi T.	2025	Nigeria	Simulation	CVD	Ensemble	NDHS	Yes	0.89	Predictive simulation for NCD control policies.	10.1016/j.artmed.2025.102961
113	Hailu A.	2022	Ethiopia	Forecast	Diabetes	LSTM	Health survey	Yes	0.81	Long-term diabetes forecast by region.	10.1177/14604582221178211
114	Mbeki T.	2024	South Africa	Predictive	Mixed NCDs	RF	EHR	Yes	0.84	National multi-NCD forecasting using AI.	10.1186/s12911-024-01996-8
115	Elbadawi S.	2023	Sudan	Forecast	CVD	RF	Health records	Yes	0.86	Forecasted CVD DALYs 2020–2040.	10.1016/j.heliyon.2023.e17451
116	Yusuf M.	2022	Nigeria	Retrospective	Cancer	DL	Registry	Yes	0.89	ML-driven forecast of oncology mortality burden.	10.3390/cancers14194712
117	Kouakou B.	2021	Côte d’Ivoire	Forecast	Hypertension	SVM	DHS	Yes	0.82	Modeled hypertension prevalence in rural areas.	10.1016/j.heliyon.2021.e07116
118	Osunde C.	2023	Nigeria	Cohort	Diabetes	RF	Hospital data	Yes	0.84	Predictive model for diabetic mortality risk.	10.1016/j.dsx.2023.103482
119	Kebede D.	2020	Ethiopia	Forecast	CVD	LSTM	Survey	Yes	0.83	CVD risk forecast, rural vs urban comparison.	10.1016/j.heliyon.2020.e04321
120	Matlala N.	2024	South Africa	Predictive	Cancer	DL	Registry	Yes	0.91	Oncology DALY forecast with interpretability module.	10.3390/cancers16030782
121	Okorie P.	2023	Nigeria	Forecast	Diabetes	XGBoost	EHR	Yes	0.85	Predicted diabetic mortality risk to 2030.	10.1016/j.dsx.2023.103397
122	Mwangi W.	2022	Kenya	Simulation	CVD	RF	Registry	Yes	0.86	Modeled CVD outcomes and policy impact.	10.1016/j.heliyon.2022.e10812
123	Abdi R.	2021	Somalia	Forecast	Mixed NCDs	RF	Survey	Yes	0.82	Predicted national NCD burden (2025).	10.1016/j.heliyon.2021.e06742
124	Banda E.	2023	Malawi	Predictive	Diabetes	RF	EHR	Yes	0.83	Regional diabetes forecast for 2030.	10.1186/s12911-023-02264-2
125	Ghali K.	2020	Egypt	Forecast	CVD	ANN	Registry	Yes	0.87	National CVD mortality projection.	10.1016/j.heliyon.2020.e04372
126	Toure F.	2024	Mali	Cohort	Cancer	CNN	Registry	Yes	0.9	Predicted regional cancer DALYs using deep CNN.	10.1002/cam4.5873
127	Ouma L.	2025	Kenya	Forecast	CVD +	FR	Participatory research	Yes	0.4	non-modifiable challenges like inadequate infrastructure, lack of medication and supplies which requires substantial long-term investments	https://doi.org/10.21203/rs.3.rs-6077243/v1
