# Supplementary material for: Predictive Artificial Intelligence Models for Non-Communicable Disease Burden Forecasting in Africa
Source: Research Square preprint supplement (doi:10.21203/rs.3.rs-8065115/v1), 2025-12-08
Supplement: Supplementary file 3 [file b09a7e6b1f5b13ac548cab93.docx]

**Data Extraction Forms for Scoping Review: Predictive AI Models for NCD Burden Forecasting in Africa**

**FORM 1: STUDY IDENTIFICATION AND BASIC CHARACTERISTICS**

**Study ID Number: ___________**

**Date of Extraction: ___________**

**Reviewer Initials: ___________**

**A. BIBLIOGRAPHIC INFORMATION**

| **Field** | **Data** |
| --- | --- |
| First Author Surname |  |
| Full Author List |  |
| Publication Year |  |
| Title |  |
| Journal/Source |  |
| Volume |  |
| Issue |  |
| Pages |  |
| DOI |  |
| PubMed ID (if applicable) |  |
| Language | ☐ English ☐ French ☐ Portuguese ☐ Other: _____ |
| Publication Type | ☐ Journal article ☐ Conference proceeding ☐ Thesis/Dissertation ☐ Technical report ☐ Other: _____ |
| Peer-reviewed | ☐ Yes ☐ No ☐ Unclear |

**B. STUDY CHARACTERISTICS**

| **Field** | **Data** |
| --- | --- |
| Study Design | ☐ Cross-sectional ☐ Cohort ☐ Case-control ☐ Registry-based ☐ Ecological ☐ Modeling study ☐ Other: _____ |
| Study Objectives (verbatim) |  |
| Study Setting | ☐ Community-based ☐ Primary care ☐ Secondary care ☐ Tertiary/Referral hospital ☐ Multi-site ☐ Population-level ☐ Other: _____ |
| Study Period (data collection) | Start: ___________ End: ___________ |
| Country/Countries of Study |  |

**C. FUNDING AND CONFLICTS OF INTEREST**

| **Field** | **Data** |
| --- | --- |
| Funding Source(s) | ☐ Government grant ☐ International agency ☐ University/Institution ☐ Private sector ☐ Philanthropic ☐ None ☐ NR |
| Specific Funder Names |  |
| Grant Numbers |  |
| Conflicts of Interest Declared | ☐ Yes ☐ No ☐ NR |
| Nature of Conflicts (if any) |  |

**FORM 2: POPULATION AND GEOGRAPHICAL CONTEXT**

**Study ID Number: ___________**

**A. GEOGRAPHICAL INFORMATION**

| **Field** | **Data** |
| --- | --- |
| **African Country/Countries** |  |
| ☐ South Africa ☐ Kenya ☐ Nigeria ☐ Egypt ☐ Ethiopia ☐ Ghana ☐ Uganda ☐ Tanzania ☐ Morocco ☐ Algeria ☐ Tunisia ☐ Cameroon ☐ Senegal ☐ Zimbabwe ☐ Malawi ☐ Rwanda ☐ Botswana ☐ Mauritius ☐ Other: _____ |  |
| **Region** | ☐ Eastern Africa ☐ Southern Africa ☐ Western Africa ☐ Northern Africa ☐ Central Africa |
| Multi-country Study | ☐ Yes ☐ No If yes, list all: _____________ |
| Specific City/Province |  |
| Urban/Rural/Mixed | ☐ Urban only ☐ Rural only ☐ Both ☐ NR |

**B. STUDY POPULATION**

| **Field** | **Data** |
| --- | --- |
| **Target Population** | ☐ General population ☐ Adults ☐ Elderly ☐ Children/Adolescents ☐ Pregnant women ☐ Patients with specific condition ☐ Other: _____ |
| **Sample Size (Total)** | n = _____ |
| **Sample Size by Disease Status** | Cases: n = _____ Controls/Non-cases: n = _____ |
| **Age Range** | Minimum: _____ Maximum: _____ Mean/Median: _____ |
| **Sex Distribution** | Male: _____% Female: _____% Other/NR: _____ |
| **Inclusion Criteria** |  |
| **Exclusion Criteria** |  |

**C. SAMPLING AND RECRUITMENT**

| **Field** | **Data** |
| --- | --- |
| Sampling Method | ☐ Random sampling ☐ Consecutive sampling ☐ Convenience sampling ☐ Stratified sampling ☐ Cluster sampling ☐ Registry-based ☐ Other: _____ |
| Sampling Frame Description |  |
| Response/Participation Rate | ____% |
| Representativeness Assessment | ☐ Representative of national population ☐ Representative of regional population ☐ Hospital-based (limited representativeness) ☐ Not assessed ☐ NR |

**FORM 3: NON-COMMUNICABLE DISEASE FOCUS**

**Study ID Number: ___________**

**A. PRIMARY NCD CATEGORY (Select all that apply)**

| **NCD Category** | **Primary Focus** | **Also Examined** | **Not Examined** |
| --- | --- | --- | --- |
| **Cardiovascular Diseases (Overall)** | ☐ | ☐ | ☐ |
| - Hypertension | ☐ | ☐ | ☐ |
| - Stroke | ☐ | ☐ | ☐ |
| - Coronary Artery Disease/IHD | ☐ | ☐ | ☐ |
| - Heart Failure | ☐ | ☐ | ☐ |
| - Atrial Fibrillation | ☐ | ☐ | ☐ |
| - Other CVD: _____________ | ☐ | ☐ | ☐ |
| **Diabetes Mellitus** | ☐ | ☐ | ☐ |
| - Type 2 Diabetes | ☐ | ☐ | ☐ |
| - Type 1 Diabetes | ☐ | ☐ | ☐ |
| - Gestational Diabetes | ☐ | ☐ | ☐ |
| - Diabetes Complications (specify): _____ | ☐ | ☐ | ☐ |
| **Cancer** | ☐ | ☐ | ☐ |
| - Breast Cancer | ☐ | ☐ | ☐ |
| - Cervical Cancer | ☐ | ☐ | ☐ |
| - Colorectal Cancer | ☐ | ☐ | ☐ |
| - Prostate Cancer | ☐ | ☐ | ☐ |
| - Liver Cancer | ☐ | ☐ | ☐ |
| - Lung Cancer | ☐ | ☐ | ☐ |
| - Other Cancer: _____________ | ☐ | ☐ | ☐ |
| **Chronic Respiratory Diseases** | ☐ | ☐ | ☐ |
| - COPD | ☐ | ☐ | ☐ |
| - Asthma | ☐ | ☐ | ☐ |
| - Other: _____________ | ☐ | ☐ | ☐ |
| **Chronic Kidney Disease** | ☐ | ☐ | ☐ |
| **Mental Health Disorders** | ☐ | ☐ | ☐ |
| - Depression | ☐ | ☐ | ☐ |
| - Anxiety Disorders | ☐ | ☐ | ☐ |
| - Substance Use Disorders | ☐ | ☐ | ☐ |
| - Other: _____________ | ☐ | ☐ | ☐ |
| **Liver Disease** | ☐ | ☐ | ☐ |
| **Osteoarthritis** | ☐ | ☐ | ☐ |
| **Multi-morbidity/Multiple NCDs** | ☐ | ☐ | ☐ |
| **Other NCD (specify): __________** | ☐ | ☐ | ☐ |

**B. DISEASE OUTCOMES EXAMINED**

| **Outcome Type** | **Examined** | **Description** |
| --- | --- | --- |
| Incidence (new cases) | ☐ Yes ☐ No |  |
| Prevalence (existing cases) | ☐ Yes ☐ No |  |
| Mortality (deaths) | ☐ Yes ☐ No |  |
| DALYs/YLLs/YLDs | ☐ Yes ☐ No |  |
| Hospitalizations | ☐ Yes ☐ No |  |
| Disease Complications | ☐ Yes ☐ No | Specify: _____________ |
| Disease Progression | ☐ Yes ☐ No |  |
| Healthcare Utilization | ☐ Yes ☐ No |  |
| Healthcare Costs | ☐ Yes ☐ No |  |
| Quality of Life | ☐ Yes ☐ No |  |
| Other: _____________ | ☐ Yes ☐ No |  |

**C. NCD RISK FACTORS EXAMINED**

**Major Risk Factors Included in Model:**

| **Risk Factor Category** | **Included** | **Variables Collected** |
| --- | --- | --- |
| Tobacco Use | ☐ Yes ☐ No |  |
| Harmful Alcohol Use | ☐ Yes ☐ No |  |
| Physical Inactivity | ☐ Yes ☐ No |  |
| Unhealthy Diet | ☐ Yes ☐ No |  |
| Obesity/Overweight | ☐ Yes ☐ No |  |
| Raised Blood Pressure | ☐ Yes ☐ No |  |
| Raised Blood Glucose | ☐ Yes ☐ No |  |
| Raised Cholesterol | ☐ Yes ☐ No |  |
| Air Pollution | ☐ Yes ☐ No |  |
| Family History/Genetics | ☐ Yes ☐ No |  |
| Other: _____________ | ☐ Yes ☐ No |  |

**FORM 4: ARTIFICIAL INTELLIGENCE AND MACHINE LEARNING METHODOLOGY**

**Study ID Number: ___________**

**A. AI/ML APPROACH CLASSIFICATION**

| **Category** | **Selected** |
| --- | --- |
| **Primary ML Type** | ☐ Supervised Learning ☐ Unsupervised Learning ☐ Semi-supervised ☐ Reinforcement Learning ☐ Hybrid |
| **Model Purpose** | ☐ Classification ☐ Regression ☐ Time-series forecasting ☐ Clustering ☐ Other: _____ |

**B. SPECIFIC ALGORITHMS EMPLOYED (Check all that apply)**

| **Algorithm Category** | **Specific Method** | **Used** | **Performance Metric** |
| --- | --- | --- | --- |
| **Ensemble Methods** |  |  |  |
|  | Random Forest | ☐ | AUC: _____ Accuracy: _____ |
|  | XGBoost | ☐ | AUC: _____ Accuracy: _____ |
|  | LightGBM | ☐ | AUC: _____ Accuracy: _____ |
|  | CatBoost | ☐ | AUC: _____ Accuracy: _____ |
|  | AdaBoost | ☐ | AUC: _____ Accuracy: _____ |
|  | Bagging | ☐ | AUC: _____ Accuracy: _____ |
|  | Other: _____ | ☐ | AUC: _____ Accuracy: _____ |
| **Support Vector Machines** |  |  |  |
|  | Linear SVM | ☐ | AUC: _____ Accuracy: _____ |
|  | RBF/Gaussian SVM | ☐ | AUC: _____ Accuracy: _____ |
|  | Polynomial SVM | ☐ | AUC: _____ Accuracy: _____ |
| **Neural Networks/Deep Learning** |  |  |  |
|  | Feedforward Neural Network | ☐ | AUC: _____ Accuracy: _____ |
|  | Convolutional Neural Network | ☐ | AUC: _____ Accuracy: _____ |
|  | Recurrent Neural Network | ☐ | AUC: _____ Accuracy: _____ |
|  | LSTM | ☐ | AUC: _____ Accuracy: _____ |
|  | GRU | ☐ | AUC: _____ Accuracy: _____ |
|  | Transformer | ☐ | AUC: _____ Accuracy: _____ |
|  | Autoencoder | ☐ | AUC: _____ Accuracy: _____ |
|  | Other: _____ | ☐ | AUC: _____ Accuracy: _____ |
| **Decision Trees** |  |  |  |
|  | Single Decision Tree/CART | ☐ | AUC: _____ Accuracy: _____ |
| **Regression Methods** |  |  |  |
|  | Logistic Regression | ☐ | AUC: _____ Accuracy: _____ |
|  | Linear Regression | ☐ | R²: _____ RMSE: _____ |
|  | Ridge/Lasso Regression | ☐ | R²: _____ RMSE: _____ |
| **Probabilistic Methods** |  |  |  |
|  | Naive Bayes (Gaussian) | ☐ | AUC: _____ Accuracy: _____ |
|  | Naive Bayes (Multinomial) | ☐ | AUC: _____ Accuracy: _____ |
|  | Bayesian Networks | ☐ | AUC: _____ Accuracy: _____ |
| **Instance-Based Learning** |  |  |  |
|  | K-Nearest Neighbors | ☐ | AUC: _____ Accuracy: _____ |
| **Clustering Methods** |  |  |  |
|  | K-Means | ☐ | Silhouette: _____ |
|  | Hierarchical Clustering | ☐ | Silhouette: _____ |
|  | DBSCAN | ☐ | Silhouette: _____ |
| **Time Series Methods** |  |  |  |
|  | ARIMA | ☐ | MAPE: _____ RMSE: _____ |
|  | Prophet | ☐ | MAPE: _____ RMSE: _____ |
|  | Exponential Smoothing | ☐ | MAPE: _____ RMSE: _____ |
| **Other** |  |  |  |
|  | Specify: _____________ | ☐ |  |

**C. MODEL DEVELOPMENT DETAILS**

| **Aspect** | **Details** |
| --- | --- |
| **Software/Programming Language** | ☐ Python ☐ R ☐ MATLAB ☐ SAS ☐ SPSS ☐ Java ☐ Other: _____ |
| **Specific Libraries/Packages** | Python: ☐ scikit-learn ☐ TensorFlow ☐ Keras ☐ PyTorch ☐ XGBoost ☐ Other: _____ <br> R: ☐ caret ☐ randomForest ☐ mlr3 ☐ Other: _____ |
| **Model Development Approach** | ☐ De novo development ☐ Adaptation of existing model ☐ Transfer learning ☐ Ensemble of multiple models ☐ Other: _____ |
| **Ensemble Method (if applicable)** | ☐ Voting ☐ Stacking ☐ Blending ☐ Boosting ☐ Bagging ☐ NA |
| **Number of Models Compared** | n = _____ |
| **Best Performing Model** | Algorithm: _____________ Reason for selection: _____________ |

**D. HYPERPARAMETER TUNING**

| **Aspect** | **Details** |
| --- | --- |
| **Hyperparameter Tuning Conducted** | ☐ Yes ☐ No ☐ NR |
| **Tuning Method** | ☐ Grid search ☐ Random search ☐ Bayesian optimization ☐ Manual tuning ☐ Default parameters ☐ Other: _____ ☐ NR |
| **Cross-validation Used for Tuning** | ☐ Yes ☐ No ☐ NR |
| **Hyperparameters Tuned** | List: _________________________________ |
| **Optimal Hyperparameter Values** |  |

**E. FEATURE SELECTION AND ENGINEERING**

| **Aspect** | **Details** |
| --- | --- |
| **Feature Selection Conducted** | ☐ Yes ☐ No ☐ NR |
| **Feature Selection Method** | ☐ Clinical judgment only ☐ Univariate selection ☐ Recursive feature elimination ☐ Lasso/Ridge regularization ☐ Tree-based importance ☐ PCA ☐ Other: _____ ☐ NR |
| **Initial Number of Features** | n = _____ |
| **Final Number of Features** | n = _____ |
| **Top 5 Most Important Features** | 1. _____________ <br> 2. _____________ <br> 3. _____________ <br> 4. _____________ <br> 5. _____________ |
| **Feature Engineering Conducted** | ☐ Yes ☐ No ☐ NR |
| **Types of Engineered Features** | ☐ Interaction terms ☐ Polynomial features ☐ Binning/categorization ☐ Derived variables ☐ Other: _____ |

**FORM 5: DATA SOURCES AND VARIABLES**

**Study ID Number: ___________**

**A. PRIMARY DATA SOURCE(S)**

| **Data Source Type** | **Primary** | **Secondary** | **Description** |
| --- | --- | --- | --- |
| Hospital EHR/EMR | ☐ | ☐ | Facility name: _____________ |
| National Health Survey | ☐ | ☐ | Survey name: _____________ |
| Disease Registry | ☐ | ☐ | Registry type: _____________ |
| Cohort Study | ☐ | ☐ | Cohort name: _____________ |
| Administrative Claims | ☐ | ☐ | Insurance system: _____________ |
| Primary Data Collection | ☐ | ☐ | Method: _____________ |
| Mobile Health/Apps | ☐ | ☐ | Platform: _____________ |
| Wearable Devices | ☐ | ☐ | Device type: _____________ |
| Global Burden of Disease | ☐ | ☐ | Year: _____________ |
| Vital Registration System | ☐ | ☐ |  |
| Surveillance System | ☐ | ☐ |  |
| Multiple Integrated Sources | ☐ | ☐ | List all: _____________ |
| Other: _____________ | ☐ | ☐ |  |

**B. DATA CHARACTERISTICS**

| **Characteristic** | **Details** |
| --- | --- |
| **Data Collection Period** | Start date: _______ End date: _______ |
| **Dataset Size (records)** | Total records: n = _____ <br> After exclusions: n = _____ |
| **Data Format** | ☐ Structured (tabular) ☐ Unstructured (text/images) ☐ Semi-structured ☐ Mixed |
| **Data Completeness** | Complete: _____% Missing data: _____% Excluded due to missingness: ____% |
| **Follow-up Duration** (if longitudinal) | Mean/Median: _______ (months/years) <br> Range: _______ to _______ |

**C. PREDICTOR VARIABLES INCLUDED**

**Demographic Variables:**

| **Variable** | **Included** | **How Measured/Coded** |
| --- | --- | --- |
| Age | ☐ Yes ☐ No | ☐ Continuous ☐ Categories: _____ |
| Sex | ☐ Yes ☐ No | ☐ Male/Female ☐ Other categories: _____ |
| Ethnicity/Race | ☐ Yes ☐ No | Categories: _____ |
| Geographic Location | ☐ Yes ☐ No | ☐ Urban/Rural ☐ Province ☐ GPS coordinates ☐ Other: _____ |
| Marital Status | ☐ Yes ☐ No |  |

**Socioeconomic Variables:**

| **Variable** | **Included** | **How Measured/Coded** |
| --- | --- | --- |
| Education Level | ☐ Yes ☐ No | Categories: _____ |
| Income/Wealth | ☐ Yes ☐ No | ☐ Continuous ☐ Quintiles ☐ Categories: _____ |
| Occupation | ☐ Yes ☐ No |  |
| Employment Status | ☐ Yes ☐ No |  |
| Household Wealth Index | ☐ Yes ☐ No |  |
| Health Insurance Coverage | ☐ Yes ☐ No |  |

**Clinical/Anthropometric Variables:**

| **Variable** | **Included** | **How Measured** |
| --- | --- | --- |
| Body Mass Index (BMI) | ☐ Yes ☐ No | ☐ Measured ☐ Self-reported ☐ Calculated |
| Waist Circumference | ☐ Yes ☐ No |  |
| Blood Pressure | ☐ Yes ☐ No | ☐ Measured ☐ Self-reported ☐ From records |
| Heart Rate | ☐ Yes ☐ No |  |
| Respiratory Rate | ☐ Yes ☐ No |  |

**Laboratory Variables:**

| **Variable** | **Included** | **Details** |
| --- | --- | --- |
| Fasting Glucose | ☐ Yes ☐ No |  |
| HbA1c | ☐ Yes ☐ No |  |
| Total Cholesterol | ☐ Yes ☐ No |  |
| LDL Cholesterol | ☐ Yes ☐ No |  |
| HDL Cholesterol | ☐ Yes ☐ No |  |
| Triglycerides | ☐ Yes ☐ No |  |
| Creatinine/eGFR | ☐ Yes ☐ No |  |
| Liver Function Tests | ☐ Yes ☐ No | Specify: _____ |
| Inflammatory Markers | ☐ Yes ☐ No | Specify: _____ |
| Other Lab Values | ☐ Yes ☐ No | Specify: _____ |

**Behavioral/Lifestyle Variables:**

| **Variable** | **Included** | **How Measured** |
| --- | --- | --- |
| Smoking Status | ☐ Yes ☐ No | ☐ Current/Former/Never ☐ Pack-years ☐ Other: _____ |
| Alcohol Consumption | ☐ Yes ☐ No | ☐ Frequency ☐ Quantity ☐ AUDIT score ☐ Other: _____ |
| Physical Activity | ☐ Yes ☐ No | ☐ IPAQ ☐ WHO guidelines ☐ Minutes/week ☐ Other: _____ |
| Dietary Patterns | ☐ Yes ☐ No | ☐ FFQ ☐ 24-hour recall ☐ Dietary score ☐ Other: _____ |
| Sleep Duration/Quality | ☐ Yes ☐ No |  |
| Stress Levels | ☐ Yes ☐ No |  |

**Medical History Variables:**

| **Variable** | **Included** | **Details** |
| --- | --- | --- |
| Family History of NCD | ☐ Yes ☐ No | Specify conditions: _____ |
| Personal History of Other NCDs | ☐ Yes ☐ No | Specify: _____ |
| Current Medications | ☐ Yes ☐ No |  |
| Previous Hospitalizations | ☐ Yes ☐ No |  |
| Comorbidity Index | ☐ Yes ☐ No | ☐ Charlson ☐ Elixhauser ☐ Other: _____ |

**Genetic/Biological Variables:**

| **Variable** | **Included** | **Details** |
| --- | --- | --- |
| Genetic Markers/SNPs | ☐ Yes ☐ No | Specify: _____ |
| Biomarkers | ☐ Yes ☐ No | Specify: _____ |

**Environmental Variables:**

| **Variable** | **Included** | **How Measured** |
| --- | --- | --- |
| Air Quality/Pollution | ☐ Yes ☐ No | ☐ PM2.5 ☐ PM10 ☐ Other: _____ |
| Urbanization Level | ☐ Yes ☐ No |  |
| Climate Variables | ☐ Yes ☐ No | Specify: _____ |
| Built Environment | ☐ Yes ☐ No |  |

**Healthcare Access Variables:**

| **Variable** | **Included** | **Details** |
| --- | --- | --- |
| Distance to Health Facility | ☐ Yes ☐ No |  |
| Healthcare Utilization | ☐ Yes ☐ No |  |
| Previous Screening | ☐ Yes ☐ No |  |

**Total Number of Predictor Variables:** n = _____

**D. MISSING DATA**

| **Aspect** | **Details** |
| --- | --- |
| **Missing Data Reported** | ☐ Yes ☐ No |
| **Percentage Missing Overall** | ____% |
| **Variables with >20% Missing** | List: _________________________________ |
| **Missing Data Pattern** | ☐ Missing Completely at Random (MCAR) ☐ Missing at Random (MAR) ☐ Missing Not at Random (MNAR) ☐ Not assessed |
| **Missing Data Handling** | ☐ Complete case analysis ☐ Multiple imputation ☐ Single imputation (mean/median/mode) ☐ Model-based imputation ☐ Indicator method ☐ Other: _____ ☐ NR |
| **Imputation Method Details** |  |

**E. DATA QUALITY ASSESSMENT**

| **Aspect** | **Details** |
| --- | --- |
| **Data Quality Assessment Conducted** | ☐ Yes ☐ No ☐ NR |
| **Quality Issues Identified** | ☐ Outliers ☐ Inconsistencies ☐ Duplicates ☐ Errors ☐ None ☐ NR |
| **Quality Control Measures** | ☐ Data cleaning protocol ☐ Outlier detection/removal ☐ Consistency checks ☐ Duplicate removal ☐ Other: _____ ☐ NR |
| **Data Standardization** | ☐ Yes ☐ No ☐ NR Method: _____________ |

**FORM 6: TEMPORAL DIMENSIONS AND FORECASTING**

**Study ID Number: ___________**

**A. TEMPORAL CLASSIFICATION**

| **Category** | **Selected** |
| --- | --- |
| **Primary Temporal Focus** | ☐ Cross-sectional risk prediction ☐ Short-term forecasting (1-3 years) ☐ Medium-term forecasting (3-5 years) ☐ Long-term forecasting (>5 years) ☐ Spatial prediction only ☐ Mixed |
| **Prediction Horizon** | ______ months/years |
| **Prediction Level** | ☐ Individual-level risk ☐ Population-level burden ☐ Both |

**B. FORECASTING METHODOLOGY (If applicable)**

| **Aspect** | **Details** |
| --- | --- |
| **Time-series Methods Used** | ☐ ARIMA ☐ SARIMA ☐ Prophet ☐ Exponential smoothing ☐ RNN/LSTM ☐ GRU ☐ Temporal CNN ☐ Transformer ☐ Other: _____ |
| **Compartmental Models** | ☐ SIR ☐ SEIR ☐ Other: _____ ☐ NA |
| **Integration with ML** | ☐ Hybrid mechanistic-ML model ☐ ML for parameter estimation ☐ ML post-processing ☐ Other: _____ ☐ NA |
| **Temporal Features** | ☐ Lags ☐ Moving averages ☐ Trends ☐ Seasonality ☐ Cycles ☐ Other: _____ |
| **Forecast Intervals Provided** | ☐ Yes ☐ No Method: ☐ Parametric ☐ Bootstrap ☐ Bayesian ☐ Other: _____ |
| **Scenario Analysis** | ☐ Yes ☐ No Number of scenarios: _____ |
| **Sensitivity Analysis** | ☐ Yes ☐ No |

**C. SPATIAL ANALYSIS (If applicable)**

| **Aspect** | **Details** |
| --- | --- |
| **Spatial Methods Used** | ☐ GIS mapping ☐ Spatial autocorrelation ☐ Geographically weighted regression ☐ Spatial clustering ☐ Hot spot analysis ☐ Other: _____ |
| **Spatial Resolution** | ☐ National ☐ Regional/Provincial ☐ District ☐ GPS coordinates ☐ Other: _____ |
| **Spatial Dependencies Addressed** | ☐ Yes ☐ No ☐ NR |

**FORM 7: MODEL VALIDATION AND PERFORMANCE**

**Study ID Number: ___________**

**A. DATA PARTITIONING**

| **Aspect** | **Details** |
| --- | --- |
| **Data Split Approach** | ☐ Train-Test split ☐ Train-Validation-Test split ☐ Cross-validation only ☐ Temporal split ☐ Geographical split ☐ Other: _____ ☐ NR |
| **Training Set Size** | n = _____ ____% of total |
| **Validation Set Size** | n = _____ ____% of total ☐ NA |
| **Test Set Size** | n = _____ ____% of total |
| **Split Ratio** | Training:Validation:Test = ***:***:_____ |
| **Stratification Used** | ☐ Yes (by outcome) ☐ Yes (by other variable): _____ ☐ No ☐ NR |
| **Random Seed Reported** | ☐ Yes (value: _____) ☐ No |

**B. VALIDATION STRATEGY**

| **Validation Type** | **Conducted** | **Details** |
| --- | --- | --- |
| **Internal Validation** |  |  |
| - Train-test split | ☐ Yes ☐ No | Split ratio: _____ |
| - K-fold cross-validation | ☐ Yes ☐ No | K = _____ ☐ Stratified ☐ Regular |
| - Leave-one-out CV | ☐ Yes ☐ No |  |
| - Bootstrap validation | ☐ Yes ☐ No | Number of bootstrap samples: _____ |
| - Monte Carlo CV | ☐ Yes ☐ No | Number of iterations: _____ |
| **External Validation** |  |  |
| - Temporal external validation | ☐ Yes ☐ No | Time period: _________ |
| - Geographical external validation | ☐ Yes ☐ No | Location: _________ |
| - Different population | ☐ Yes ☐ No | Population: _________ |
| - Different setting | ☐ Yes ☐ No | Setting: _________ |
| **No Explicit Validation** | ☐ Yes |  |

**External Validation Dataset Details (if applicable):**

| **Aspect** | **Details** |
| --- | --- |
| Source of external data |  |
| Sample size | n = _____ |
| Time period |  |
| Geographic location |  |
| Similarity to development dataset | ☐ Very similar ☐ Somewhat similar ☐ Different ☐ NR |

**C. PERFORMANCE METRICS - DISCRIMINATION**

| **Metric** | **Reported** | **Value** | **95% CI** |
| --- | --- | --- | --- |
| **Classification Metrics** |  |  |  |
| AUC-ROC | ☐ Yes ☐ No | _____ | _____ to _____ |
| AUC-PR (Precision-Recall) | ☐ Yes ☐ No | _____ | _____ to _____ |
| Accuracy | ☐ Yes ☐ No | ____% | _____ to _____ |
| Sensitivity/Recall | ☐ Yes ☐ No | ____% | _____ to _____ |
| Specificity | ☐ Yes ☐ No | ____% | _____ to _____ |
| Positive Predictive Value (PPV)/Precision | ☐ Yes ☐ No | ____% | _____ to _____ |
| Negative Predictive Value (NPV) | ☐ Yes ☐ No | ____% | _____ to _____ |
| F1-Score | ☐ Yes ☐ No | _____ | _____ to _____ |
| F2-Score | ☐ Yes ☐ No | _____ | _____ to _____ |
| Cohen's Kappa | ☐ Yes ☐ No | _____ | _____ to _____ |
| Matthews Correlation Coefficient | ☐ Yes ☐ No | _____ | _____ to _____ |
| Youden's Index | ☐ Yes ☐ No | _____ | _____ to _____ |
| **Regression Metrics** |  |  |  |
| R² (R-squared) | ☐ Yes ☐ No | _____ | _____ to _____ |
| Adjusted R² | ☐ Yes ☐ No | _____ | _____ to _____ |
| Mean Absolute Error (MAE) | ☐ Yes ☐ No | _____ | _____ to _____ |
| Root Mean Square Error (RMSE) | ☐ Yes ☐ No | _____ | _____ to _____ |
| Mean Absolute Percentage Error (MAPE) | ☐ Yes ☐ No | ____% | _____ to _____ |
| **Other Metrics** |  |  |  |
| C-statistic | ☐ Yes ☐ No | _____ | _____ to _____ |
| D-statistic | ☐ Yes ☐ No | _____ | _____ to _____ |
| Net Reclassification Index (NRI) | ☐ Yes ☐ No | _____ | _____ to _____ |
| Integrated Discrimination Improvement (IDI) | ☐ Yes ☐ No | _____ | _____ to _____ |

**D. PERFORMANCE METRICS - CALIBRATION**

| **Metric/Assessment** | **Reported** | **Details** |
| --- | --- | --- |
| **Calibration Assessment Conducted** | ☐ Yes ☐ No |  |
| Hosmer-Lemeshow test | ☐ Yes ☐ No | χ² = _____ p = _____ Number of groups: _____ |
| Calibration plot/curve | ☐ Yes ☐ No | ☐ Well-calibrated ☐ Overestimation ☐ Underestimation |
| Calibration-in-the-large | ☐ Yes ☐ No | Value: _____ |
| Calibration slope | ☐ Yes ☐ No | Slope = _____ (Ideal = 1.0) |
| Brier Score | ☐ Yes ☐ No | Score = _____ |
| Expected/Observed ratio (E/O) | ☐ Yes ☐ No | E/O = _____ |

**E. MODEL COMPARISON**

| **Aspect** | **Details** |
| --- | --- |
| **Multiple Models Compared** | ☐ Yes ☐ No Number of models: _____ |
| **Comparison Method** | ☐ AUC comparison ☐ DeLong test ☐ McNemar's test ☐ Likelihood ratio test ☐ AIC/BIC ☐ Other: _____ ☐ NR |
| **Statistical Testing of Differences** | ☐ Yes ☐ No Method: _____________ |
| **Best Model Selection Criteria** | ☐ Highest AUC ☐ Best balance of metrics ☐ Clinical interpretability ☐ Simplicity ☐ Other: _____ |

**Comparison with Existing Models/Scores:**

| **Comparator** | **Compared** | **Performance vs. ML Model** |
| --- | --- | --- |
| Logistic regression | ☐ Yes ☐ No | ☐ ML superior ☐ ML inferior ☐ Similar ☐ NR |
| Framingham Risk Score | ☐ Yes ☐ No | ☐ ML superior ☐ ML inferior ☐ Similar ☐ NR |
| QRISK | ☐ Yes ☐ No | ☐ ML superior ☐ ML inferior ☐ Similar ☐ NR |
| FINDRISC | ☐ Yes ☐ No | ☐ ML superior ☐ ML inferior ☐ Similar ☐ NR |
| Other clinical score: _____ | ☐ Yes ☐ No | ☐ ML superior ☐ ML inferior ☐ Similar ☐ NR |

**Performance Improvement:** AUC improvement = _____ (ML minus comparator)

**F. OVERFITTING ASSESSMENT**

| **Aspect** | **Details** |
| --- | --- |
| **Overfitting Addressed** | ☐ Yes ☐ No ☐ NR |
| **Methods to Prevent Overfitting** | ☐ Regularization (L1/L2) ☐ Early stopping ☐ Dropout ☐ Cross-validation ☐ Pruning ☐ Max depth limitation ☐ Other: _____ ☐ NR |
| **Performance Gap** | Training AUC: _____ Validation/Test AUC: _____ Gap: _____ |
| **Overfitting Detected** | ☐ Yes ☐ No ☐ NR |

**FORM 8: MODEL INTERPRETABILITY AND EXPLAINABILITY**

**Study ID Number: ___________**

**A. INTERPRETABILITY ASSESSMENT**

| **Aspect** | **Details** |
| --- | --- |
| **Interpretability/Explainability Addressed** | ☐ Yes ☐ No |
| **Model Inherently Interpretable** | ☐ Yes (e.g., logistic regression, decision tree) ☐ No (black box model) |
| **Explainability Methods Used** | ☐ Feature importance ☐ SHAP values ☐ LIME ☐ Partial dependence plots ☐ Individual conditional expectation ☐ Permutation importance ☐ Attention mechanisms ☐ Other: _____ ☐ None |

**B. FEATURE IMPORTANCE**

| **Aspect** | **Details** |
| --- | --- |
| **Feature Importance Reported** | ☐ Yes ☐ No |
| **Method for Importance** | ☐ Built-in model importance ☐ Permutation importance ☐ SHAP values ☐ Coefficient magnitude ☐ Other: _____ |

**Top 10 Most Important Features:**

| **Rank** | **Feature Name** | **Importance Score** | **Interpretation** |
| --- | --- | --- | --- |
| 1 |  |  |  |
| 2 |  |  |  |
| 3 |  |  |  |
| 4 |  |  |  |
| 5 |  |  |  |
| 6 |  |  |  |
| 7 |  |  |  |
| 8 |  |  |  |
| 9 |  |  |  |
| 10 |  |  |  |

**C. SHAP VALUES (If used)**

| **Aspect** | **Details** |
| --- | --- |
| **SHAP Analysis Conducted** | ☐ Yes ☐ No |
| **SHAP Visualizations Provided** | ☐ Summary plot ☐ Force plot ☐ Dependence plot ☐ Waterfall plot ☐ Other: _____ |
| **Individual Prediction Explanations** | ☐ Yes ☐ No |

**D. CLINICAL INTERPRETABILITY**

| **Aspect** | **Details** |
| --- | --- |
| **Clinical Interpretation Provided** | ☐ Yes ☐ No |
| **Direction of Associations Clinically Plausible** | ☐ Yes ☐ Mostly ☐ Some unexpected ☐ No ☐ NR |
| **Unexpected Associations Explained** | ☐ Yes ☐ No ☐ NA |
| **Decision Thresholds Discussed** | ☐ Yes ☐ No |
| **Optimal Threshold Reported** | Value: _____ Criterion: ☐ Youden's index ☐ Clinical judgment ☐ Cost-benefit ☐ Other: _____ |

**FORM 9: IMPLEMENTATION AND DEPLOYMENT**

**Study ID Number: ___________**

**A. IMPLEMENTATION STATUS**

| **Aspect** | **Details** |
| --- | --- |
| **Model Implementation Status** | ☐ Development only ☐ Validation only ☐ Pilot implementation ☐ Scaled implementation ☐ Routine use |
| **Implementation Setting** | ☐ Clinical EHR ☐ Mobile app ☐ Web platform ☐ Surveillance system ☐ Decision support tool ☐ Other: _____ ☐ NA |
| **Implementation Description** |  |
| **Number of Sites/Facilities** | n = _____ ☐ NA |
| **Number of End-Users** | n = _____ ☐ NA |
| **Implementation Period** | Start: _______ End: _______ ☐ Ongoing ☐ NA |

**B. USABILITY AND DEPLOYMENT**

| **Aspect** | **Details** |
| --- | --- |
| **User Interface Developed** | ☐ Yes ☐ No ☐ NA |
| **User Interface Type** | ☐ Command-line ☐ GUI desktop ☐ Web-based ☐ Mobile app ☐ API ☐ Other: _____ ☐ NA |
| **Model Accessibility** | ☐ Open source/freely available ☐ Commercial ☐ Institutional use only ☐ Not accessible ☐ NR |
| **Code Availability** | ☐ GitHub/GitLab ☐ Journal supplement ☐ Upon request ☐ Not available ☐ NR |
| **Model Hosting** | ☐ Cloud-based ☐ Local server ☐ Edge device ☐ Other: _____ ☐ NA |
| **Computational Requirements** | ☐ Low (standard computer) ☐ Moderate ☐ High (GPU needed) ☐ NR |
| **Real-time Prediction Capability** | ☐ Yes ☐ No ☐ NR ☐ NA |
| **Prediction Speed** | Time per prediction: _______ ☐ NR ☐ NA |

**C. IMPLEMENTATION BARRIERS AND FACILITATORS**

| **Barriers Mentioned** | **Yes/No** | **Details** |
| --- | --- | --- |
| Insufficient digital infrastructure | ☐ Yes ☐ No |  |
| Unreliable internet connectivity | ☐ Yes ☐ No |  |
| Limited interoperability | ☐ Yes ☐ No |  |
| Inadequate training/capacity | ☐ Yes ☐ No |  |
| Data privacy/security concerns | ☐ Yes ☐ No |  |
| Lack of regulatory framework | ☐ Yes ☐ No |  |
| Insufficient funding | ☐ Yes ☐ No |  |
| Cultural resistance/mistrust | ☐ Yes ☐ No |  |
| Lack of stakeholder buy-in | ☐ Yes ☐ No |  |
| High computational costs | ☐ Yes ☐ No |  |
| Model complexity/lack of interpretability | ☐ Yes ☐ No |  |
| Other: _____________ | ☐ Yes ☐ No |  |

| **Facilitators Mentioned** | **Yes/No** | **Details** |
| --- | --- | --- |
| Strong institutional support | ☐ Yes ☐ No |  |
| Available infrastructure | ☐ Yes ☐ No |  |
| Trained personnel | ☐ Yes ☐ No |  |
| Stakeholder engagement | ☐ Yes ☐ No |  |
| Clear regulatory pathway | ☐ Yes ☐ No |  |
| Funding availability | ☐ Yes ☐ No |  |
| Partnerships/collaborations | ☐ Yes ☐ No |  |
| User-friendly interface | ☐ Yes ☐ No |  |
| Other: _____________ | ☐ Yes ☐ No |  |

**D. USER ACCEPTANCE AND SATISFACTION**

| **Aspect** | **Details** |
| --- | --- |
| **User Acceptance Assessed** | ☐ Yes ☐ No ☐ NA |
| **Assessment Method** | ☐ Survey ☐ Interview ☐ Focus group ☐ Usage metrics ☐ Other: _____ ☐ NA |
| **Acceptance Rate** | ____% or qualitative assessment: _____________ |
| **User Satisfaction** | ☐ Very satisfied ☐ Satisfied ☐ Neutral ☐ Dissatisfied ☐ NR ☐ NA |
| **Clinician Feedback** |  |
| **Patient Feedback** |  |

**FORM 10: ECONOMIC EVALUATION AND EQUITY**

**Study ID Number: ___________**

**A. ECONOMIC EVALUATION**

| **Aspect** | **Details** |
| --- | --- |
| **Economic Evaluation Conducted** | ☐ Yes ☐ No |
| **Type of Economic Analysis** | ☐ Cost-effectiveness analysis ☐ Cost-utility analysis ☐ Cost-benefit analysis ☐ Budget impact analysis ☐ Cost analysis only ☐ Other: _____ |
| **Perspective** | ☐ Healthcare system ☐ Societal ☐ Patient ☐ Payer ☐ Other: _____ |
| **Time Horizon** | _______ years |
| **Currency and Year** | Currency: _____ Year: _____ |
| **Discount Rate** | ____% |

**Cost Components:**

| **Cost Category** | **Included** | **Amount** |
| --- | --- | --- |
| Model development costs | ☐ Yes ☐ No |  |
| Implementation costs | ☐ Yes ☐ No |  |
| Training costs | ☐ Yes ☐ No |  |
| Infrastructure costs | ☐ Yes ☐ No |  |
| Operational/maintenance costs | ☐ Yes ☐ No |  |
| Healthcare costs averted | ☐ Yes ☐ No |  |
| Productivity gains | ☐ Yes ☐ No |  |

**Economic Outcomes:**

| **Outcome** | **Value** |
| --- | --- |
| Incremental Cost-Effectiveness Ratio (ICER) | _______ per DALY averted / per QALY gained / other: _____ |
| Cost per case detected |  |
| Cost per case prevented |  |
| Return on investment | ____% |
| Budget impact |  |
| Cost-effectiveness conclusion | ☐ Cost-effective ☐ Not cost-effective ☐ Dominant ☐ Dominated ☐ Unclear |
| Willingness-to-pay threshold | _______ per DALY/QALY |
| Below WTP threshold? | ☐ Yes ☐ No ☐ Unclear |

**B. EQUITY CONSIDERATIONS**

| **Aspect** | **Details** |
| --- | --- |
| **Equity/Fairness Explicitly Addressed** | ☐ Yes ☐ No |
| **Subgroup Analyses Conducted** | ☐ Yes ☐ No |

**Subgroups Analyzed:**

| **Subgroup** | **Analyzed** | **Performance Difference Detected** |
| --- | --- | --- |
| Sex/Gender | ☐ Yes ☐ No | ☐ Yes - better for: _____ ☐ No difference ☐ NR |
| Age groups | ☐ Yes ☐ No | ☐ Yes - better for: _____ ☐ No difference ☐ NR |
| Socioeconomic status | ☐ Yes ☐ No | ☐ Yes - better for: _____ ☐ No difference ☐ NR |
| Urban vs. Rural | ☐ Yes ☐ No | ☐ Yes - better for: _____ ☐ No difference ☐ NR |
| Ethnicity/Race | ☐ Yes ☐ No | ☐ Yes - better for: _____ ☐ No difference ☐ NR |
| Education level | ☐ Yes ☐ No | ☐ Yes - better for: _____ ☐ No difference ☐ NR |
| Geographic region | ☐ Yes ☐ No | ☐ Yes - better for: _____ ☐ No difference ☐ NR |
| Health insurance status | ☐ Yes ☐ No | ☐ Yes - better for: _____ ☐ No difference ☐ NR |

**Algorithmic Fairness:**

| **Aspect** | **Details** |
| --- | --- |
| **Fairness Metrics Assessed** | ☐ Yes ☐ No |
| **Fairness Definition Used** | ☐ Demographic parity ☐ Equalized odds ☐ Equal opportunity ☐ Calibration fairness ☐ Other: _____ ☐ NA |
| **Bias Detected** | ☐ Yes - describe: _____________ ☐ No ☐ Not assessed |
| **Bias Mitigation Strategies** | ☐ Pre-processing (data balancing) ☐ In-processing (fairness constraints) ☐ Post-processing (threshold adjustment) ☐ Other: _____ ☐ None ☐ NA |
| **Equity Implications Discussed** | ☐ Yes ☐ No |
| **Risk of Exacerbating Inequities** | ☐ High ☐ Moderate ☐ Low ☐ Not assessed |

**C. ETHICAL CONSIDERATIONS**

| **Aspect** | **Details** |
| --- | --- |
| **Ethical Issues Discussed** | ☐ Yes ☐ No |
| **Ethics Approval Obtained** | ☐ Yes ☐ No ☐ Not required ☐ NR |
| **Ethics Committee Name** |  |
| **Informed Consent** | ☐ Obtained ☐ Waived ☐ Not applicable (secondary data) ☐ NR |

**Ethical Considerations Addressed:**

| **Issue** | **Discussed** | **Details** |
| --- | --- | --- |
| Data privacy and confidentiality | ☐ Yes ☐ No |  |
| Informed consent for data use | ☐ Yes ☐ No |  |
| Potential harms from false predictions | ☐ Yes ☐ No |  |
| Autonomy and human oversight | ☐ Yes ☐ No |  |
| Transparency and explainability | ☐ Yes ☐ No |  |
| Accountability and governance | ☐ Yes ☐ No |  |
| Data ownership and sovereignty | ☐ Yes ☐ No |  |
| Benefit sharing | ☐ Yes ☐ No |  |
| Dual use concerns | ☐ Yes ☐ No |  |

**Data Protection Measures:**

| **Measure** | **Implemented** |
| --- | --- |
| De-identification/Anonymization | ☐ Yes ☐ No ☐ NR |
| Data encryption | ☐ Yes ☐ No ☐ NR |
| Differential privacy | ☐ Yes ☐ No ☐ NR |
| Federated learning | ☐ Yes ☐ No ☐ NR |
| Secure data storage | ☐ Yes ☐ No ☐ NR |
| Access controls | ☐ Yes ☐ No ☐ NR |
| Data use agreements | ☐ Yes ☐ No ☐ NR |

**FORM 11: COLLABORATIVE NETWORKS AND AUTHORSHIP**

**Study ID Number: ___________**

**A. AUTHOR AFFILIATIONS**

**First Author:**

| **Aspect** | **Details** |
| --- | --- |
| First Author Name |  |
| Institution |  |
| Department |  |
| Country |  |
| African Institution? | ☐ Yes ☐ No |

**Senior/Corresponding Author:**

| **Aspect** | **Details** |
| --- | --- |
| Senior Author Name |  |
| Institution |  |
| Department |  |
| Country |  |
| African Institution? | ☐ Yes ☐ No |

**All Authors:**

| **Total Number of Authors** | **n = _____** |
| --- | --- |
| Authors from African Institutions | n = _____ (____%) |
| Authors from High-Income Countries | n = _____ (____%) |

**B. INSTITUTIONAL COLLABORATIONS**

**Participating Institutions (List all):**

| **Institution Name** | **Country** | **Institution Type** | **Role** |
| --- | --- | --- | --- |
| 1. |  | ☐ University ☐ Hospital ☐ Research Institute ☐ Government ☐ NGO ☐ Private | ☐ Lead ☐ Collaborator |
| 2. |  | ☐ University ☐ Hospital ☐ Research Institute ☐ Government ☐ NGO ☐ Private | ☐ Lead ☐ Collaborator |
| 3. |  | ☐ University ☐ Hospital ☐ Research Institute ☐ Government ☐ NGO ☐ Private | ☐ Lead ☐ Collaborator |
| 4. |  | ☐ University ☐ Hospital ☐ Research Institute ☐ Government ☐ NGO ☐ Private | ☐ Lead ☐ Collaborator |
| 5. |  | ☐ University ☐ Hospital ☐ Research Institute ☐ Government ☐ NGO ☐ Private | ☐ Lead ☐ Collaborator |

**Collaboration Type:**

| **Type** | **Identified** |
| --- | --- |
| North-South collaboration (African + HIC) | ☐ Yes ☐ No |
| South-South collaboration (Multiple African) | ☐ Yes ☐ No |
| African-led research | ☐ Yes (First & Senior authors African) ☐ No |
| HIC-led research on African data | ☐ Yes ☐ No |
| Single institution | ☐ Yes ☐ No |

**C. RESEARCH CAPACITY**

| **Aspect** | **Details** |
| --- | --- |
| **Capacity Building Component** | ☐ Yes ☐ No Describe: _____________ |
| **Training Provided** | ☐ Yes ☐ No Type: _____________ |
| **Technology Transfer** | ☐ Yes ☐ No Details: _____________ |
| **Local Expertise Development** | ☐ Yes ☐ No Details: _____________ |

**FORM 12: STUDY QUALITY ASSESSMENT (PROBAST)**

**Study ID Number: ___________**

**Instructions:** Rate each domain as Low, Moderate, or High risk of bias. Provide justification for ratings.

**DOMAIN 1: PARTICIPANTS**

| **Question** | **Response** | **Notes** |
| --- | --- | --- |
| Were appropriate data sources used? | ☐ Yes ☐ Partly ☐ No ☐ Unclear |  |
| Were all inclusions and exclusions appropriate? | ☐ Yes ☐ Partly ☐ No ☐ Unclear |  |
| **Overall Risk of Bias - Participants** | ☐ Low ☐ Moderate ☐ High | **Justification:** |
| **Applicability - Participants** | ☐ Low concern ☐ Moderate concern ☐ High concern | **Justification:** |

**DOMAIN 2: PREDICTORS**

| **Question** | **Response** | **Notes** |
| --- | --- | --- |
| Were predictors defined and assessed in a similar way for all participants? | ☐ Yes ☐ Partly ☐ No ☐ Unclear |  |
| Were all predictors available at the time the model is intended to be used? | ☐ Yes ☐ Partly ☐ No ☐ Unclear |  |
| Were predictor assessments made without knowledge of outcome data? | ☐ Yes ☐ Partly ☐ No ☐ Unclear |  |
| **Overall Risk of Bias - Predictors** | ☐ Low ☐ Moderate ☐ High | **Justification:** |
| **Applicability - Predictors** | ☐ Low concern ☐ Moderate concern ☐ High concern | **Justification:** |

**DOMAIN 3: OUTCOME**

| **Question** | **Response** | **Notes** |
| --- | --- | --- |
| Was the outcome determined appropriately? | ☐ Yes ☐ Partly ☐ No ☐ Unclear |  |
| Was a pre-specified or standard outcome definition used? | ☐ Yes ☐ Partly ☐ No ☐ Unclear |  |
| Were predictors excluded from the outcome definition? | ☐ Yes ☐ Partly ☐ No ☐ Unclear |  |
| Was the outcome defined and determined in a similar way for all participants? | ☐ Yes ☐ Partly ☐ No ☐ Unclear |  |
| Was the outcome determined without knowledge of predictor information? | ☐ Yes ☐ Partly ☐ No ☐ Unclear |  |
| Was an appropriate time interval between predictor assessment and outcome determination? | ☐ Yes ☐ Partly ☐ No ☐ Unclear |  |
| **Overall Risk of Bias - Outcome** | ☐ Low ☐ Moderate ☐ High | **Justification:** |
| **Applicability - Outcome** | ☐ Low concern ☐ Moderate concern ☐ High concern | **Justification:** |

**DOMAIN 4: ANALYSIS**

| **Question** | **Response** | **Notes** |
| --- | --- | --- |
| Were there a reasonable number of participants with the outcome? | ☐ Yes ☐ Partly ☐ No ☐ Unclear | Events per variable: _____ |
| Were continuous and categorical predictors handled appropriately? | ☐ Yes ☐ Partly ☐ No ☐ Unclear |  |
| Were all enrolled participants included in the analysis? | ☐ Yes ☐ Partly ☐ No ☐ Unclear |  |
| Were participants with missing data handled appropriately? | ☐ Yes ☐ Partly ☐ No ☐ Unclear |  |
| Was selection of predictors based on univariable analysis avoided? | ☐ Yes ☐ Partly ☐ No ☐ Unclear |  |
| Were complexities in the data accounted for appropriately? | ☐ Yes ☐ Partly ☐ No ☐ Unclear | (e.g., clustering, competing risks) |
| Were relevant model performance measures evaluated? | ☐ Yes ☐ Partly ☐ No ☐ Unclear |  |
| Were model overfitting and optimism accounted for? | ☐ Yes ☐ Partly ☐ No ☐ Unclear |  |
| Do predictors and outcome form part of the same causal pathway? | ☐ Yes ☐ Partly ☐ No ☐ Unclear |  |
| **Overall Risk of Bias - Analysis** | ☐ Low ☐ Moderate ☐ High | **Justification:** |

**OVERALL ASSESSMENT**

| **Domain** | **Risk of Bias** | **Applicability Concern** |
| --- | --- | --- |
| Participants | ☐ Low ☐ Moderate ☐ High | ☐ Low ☐ Moderate ☐ High |
| Predictors | ☐ Low ☐ Moderate ☐ High | ☐ Low ☐ Moderate ☐ High |
| Outcome | ☐ Low ☐ Moderate ☐ High | ☐ Low ☐ Moderate ☐ High |
| Analysis | ☐ Low ☐ Moderate ☐ High | N/A |

**Overall Risk of Bias:** ☐ Low ☐ Moderate ☐ High

**Overall Applicability:** ☐ Low concern ☐ Moderate concern ☐ High concern

**FORM 13: KEY FINDINGS AND IMPLICATIONS**

**Study ID Number: ___________**

**A. PRIMARY FINDINGS**

**Main Results (verbatim from abstract/conclusion):**

**Key Findings - Summary:**

| **Finding Category** | **Description** |
| --- | --- |
| **Best Performing Model** | Algorithm: _____________ Performance: _____________ |
| **Most Important Predictors** | 1. _____________ <br> 2. _____________ <br> 3. _____________ |
| **Prediction Accuracy** |  |
| **Clinical/Policy Implications** |  |
| **Novel Contributions** |  |

**B. STUDY LIMITATIONS**

**Limitations Acknowledged by Authors:**

| **Limitation** | **Mentioned** | **Description** |
| --- | --- | --- |
| Small sample size | ☐ Yes ☐ No |  |
| Limited generalizability | ☐ Yes ☐ No |  |
| Missing data | ☐ Yes ☐ No |  |
| Selection bias | ☐ Yes ☐ No |  |
| Measurement error | ☐ Yes ☐ No |  |
| Lack of external validation | ☐ Yes ☐ No |  |
| Cross-sectional design | ☐ Yes ☐ No |  |
| Residual confounding | ☐ Yes ☐ No |  |
| Lack of temporal validation | ☐ Yes ☐ No |  |
| Implementation challenges not addressed | ☐ Yes ☐ No |  |
| Other: _____________ | ☐ Yes ☐ No |  |

**Limitations Identified by Reviewers (not mentioned by authors):**

**C. IMPLICATIONS AND RECOMMENDATIONS**

**Authors' Recommendations for:**

| **Stakeholder** | **Recommendations** |
| --- | --- |
| **Clinical Practice** |  |
| **Health Policy** |  |
| **Future Research** |  |
| **Implementation** |  |

**D. KNOWLEDGE GAPS IDENTIFIED**

**Gaps Identified by Authors:**

**E. FUTURE RESEARCH PRIORITIES**

**Future Research Suggested:**

**FORM 14: ADDITIONAL NOTES AND COMMENTS**

**Study ID Number: ___________**

**A. REVIEWER NOTES**

**Strengths of the Study:**

**Weaknesses of the Study:**

**Unique or Innovative Aspects:**

**Concerns or Issues:**

**B. RELEVANCE TO REVIEW QUESTIONS**

**How does this study address the review questions?**

| **Review Question** | **Relevance (High/Medium/Low)** | **Notes** |
| --- | --- | --- |
| RQ1: Extent and nature of literature |  |  |
| RQ2: Disease categories addressed |  |  |
| RQ3: Geographical distribution |  |  |
| RQ4: AI/ML methodological approaches |  |  |
| RQ5: Data sources used |  |  |
| RQ6: Temporal dimensions |  |  |
| RQ7: Validation strategies |  |  |
| RQ8: Knowledge gaps |  |  |

**C. EXTRACTION QUALITY CONTROL**

| **Aspect** | **Details** |
| --- | --- |
| **Date of Extraction** |  |
| **Primary Reviewer** | Name: _____________ Initials: _____ |
| **Secondary Reviewer** | Name: _____________ Initials: _____ |
| **Discrepancies Identified** | ☐ Yes ☐ No If yes, describe: _____________ |
| **Discrepancy Resolution** | ☐ Consensus reached ☐ Third reviewer consulted ☐ NA |
| **Third Reviewer (if applicable)** | Name: _____________ Initials: _____ |
| **Data Extraction Finalized** | Date: _____________ By: _____________ |
| **Quality Check Completed** | ☐ Yes ☐ No Date: _____________ By: _____________ |

**D. ADDITIONAL COMMENTS**

**APPENDIX: DATA EXTRACTION CHECKLIST**

**Use this checklist to ensure all forms are completed:**

| **Form Number** | **Form Title** | **Completed** | **Reviewed** | **Notes** |
| --- | --- | --- | --- | --- |
| 1 | Study Identification and Basic Characteristics | ☐ | ☐ |  |
| 2 | Population and Geographical Context | ☐ | ☐ |  |
| 3 | Non-Communicable Disease Focus | ☐ | ☐ |  |
| 4 | Artificial Intelligence and ML Methodology | ☐ | ☐ |  |
| 5 | Data Sources and Variables | ☐ | ☐ |  |
| 6 | Temporal Dimensions and Forecasting | ☐ | ☐ |  |
| 7 | Model Validation and Performance | ☐ | ☐ |  |
| 8 | Model Interpretability and Explainability | ☐ | ☐ |  |
| 9 | Implementation and Deployment | ☐ | ☐ |  |
| 10 | Economic Evaluation and Equity | ☐ | ☐ |  |
| 11 | Collaborative Networks and Authorship | ☐ | ☐ |  |
| 12 | Study Quality Assessment (PROBAST) | ☐ | ☐ |  |
| 13 | Key Findings and Implications | ☐ | ☐ |  |
| 14 | Additional Notes and Comments | ☐ | ☐ |  |

**INSTRUCTIONS FOR DATA SYNTHESIS**

**After completing data extraction for all studies:**

**1. Data Cleaning and Verification**

- Review all extracted data for consistency
- Resolve any remaining discrepancies
- Verify key data points (sample sizes, performance metrics) against original papers
- Code categorical variables consistently

**2. Data Entry into Master Database**

- Enter all data into Excel/SPSS/R/Stata database
- Use consistent variable naming conventions
- Include data dictionary with variable definitions
- Perform range checks and logical checks

**3. Descriptive Analysis**

- Calculate frequencies and percentages for categorical variables
- Calculate means, medians, ranges for continuous variables
- Create summary tables for all key characteristics
- Generate data visualizations (charts, maps, network diagrams)

**4. Thematic Synthesis**

- Group similar findings across studies
- Identify common themes in barriers, facilitators, recommendations
- Categorize knowledge gaps
- Identify patterns in collaboration networks

**5. Quality Assessment Summary**

- Calculate proportions of studies with low/moderate/high risk of bias
- Identify common quality issues across studies
- Assess whether quality issues affect conclusions

**6. Gap Analysis**

- Systematically identify gaps across all dimensions:
  - Geographical gaps
  - Disease-specific gaps
  - Methodological gaps
  - Data infrastructure gaps
  - Implementation science gaps
  - Validation gaps

**DATA DICTIONARY FOR MASTER DATABASE**

**This data dictionary should accompany your extracted data to ensure consistency and reproducibility.**

**Variable Naming Convention:**

- Use lowercase with underscores (e.g., study_id, first_author)
- No spaces or special characters
- Maximum 32 characters per variable name
- Use descriptive but concise names

**Missing Data Codes:**

- -999 = Not Reported
- -888 = Not Applicable
- -777 = Unclear/Cannot Determine
- Leave blank for truly missing data

**Categorical Variable Coding:**

Create consistent numeric codes for all categorical variables (e.g., Country: 1=South Africa, 2=Kenya, 3=Nigeria, etc.)

**QUALITY CONTROL PROTOCOL**

**Before Beginning Extraction:**

1. ☐ Read full methodology section of this protocol
2. ☐ Complete training/calibration exercise with 5 pilot studies
3. ☐ Achieve inter-rater agreement κ ≥ 0.80
4. ☐ Resolve any questions about form interpretation

**During Extraction:**

1. ☐ Extract from PDF or full-text (not abstracts alone)
2. ☐ Record page numbers for all extracted data
3. ☐ Use direct quotes for key findings
4. ☐ Flag any uncertainties for discussion
5. ☐ Complete all applicable sections
6. ☐ Save work regularly

**After Extraction:**

1. ☐ Second reviewer independently extracts same study
2. ☐ Compare extractions and calculate agreement
3. ☐ Resolve discrepancies through discussion
4. ☐ Consult third reviewer if needed
5. ☐ Senior author spot-checks 20% of extractions
6. ☐ Finalize extraction and lock data

**CONTACT INFORMATION FOR EXTRACTION TEAM**

| **Role** | **Name** | **Email** | **Phone** |
| --- | --- | --- | --- |
| Principal Investigator |  |  |  |
| Senior Reviewer |  |  |  |
| Primary Reviewer 1 |  |  |  |
| Primary Reviewer 2 |  |  |  |
| Data Manager |  |  |  |
| Statistician |  |  |  |

**For Questions or Issues:**

- Technical issues with forms: Contact [Data Manager]
- Methodological questions: Contact [Senior Reviewer]
- Administrative issues: Contact [Principal Investigator]

**VERSION CONTROL**

| **Version** | **Date** | **Changes Made** | **Approved By** |
| --- | --- | --- | --- |
| 1.0 | [Date] | Initial forms created |  |
| 1.1 | [Date] | Revised after pilot testing |  |
| 2.0 | [Date] | Final version for data extraction |  |
