# Supplementary material for: Predictive Artificial Intelligence Models for Non-Communicable Disease Burden Forecasting in Africa
Source: Research Square preprint supplement (doi:10.21203/rs.3.rs-8065115/v1), 2025-12-08
Supplement: Supplementary file 4 [file c277e80f38ea312d3dee0d22.docx]

## **Supplementary File B**

### **Detailed Search Strategies for All Databases**

| **Database** | **Search Terms** | **Records** |
| --- | --- | --- |
| **PubMed/MEDLINE Search Strategy** | 1. "Artificial Intelligence"[MeSH] OR "Machine Learning"[MeSH] OR "Deep Learning"[MeSH] OR "Neural Networks, Computer"[MeSH]  2. "artificial intelligence"[tiab] OR "machine learning"[tiab] OR "deep learning"[tiab] OR "neural network*"[tiab] OR "random forest*"[tiab] OR "support vector machine*"[tiab] OR "gradient boosting"[tiab] OR "predictive model*"[tiab] OR "prediction model*"[tiab] OR "forecasting model*"[tiab] OR "computational intelligence"[tiab] OR "ensemble learning"[tiab] OR "supervised learning"[tiab]  3. #1 OR #2  4. "Noncommunicable Diseases"[MeSH] OR "Cardiovascular Diseases"[MeSH] OR "Diabetes Mellitus"[MeSH] OR "Neoplasms"[MeSH] OR "Chronic Disease"[MeSH] OR "Respiratory Tract Diseases"[MeSH]  5. "non-communicable disease*"[tiab] OR "noncommunicable disease*"[tiab] OR NCD[tiab] OR NCDs[tiab] OR "cardiovascular disease*"[tiab] OR hypertension[tiab] OR "heart disease*"[tiab] OR stroke[tiab] OR diabetes[tiab] OR cancer*[tiab] OR neoplasm*[tiab] OR "chronic respiratory disease*"[tiab] OR "chronic obstructive pulmonary disease"[tiab] OR COPD[tiab] OR asthma[tiab] OR "disease burden"[tiab] OR "mortality prediction"[tiab] OR "morbidity prediction"[tiab]  6. #4 OR #5  7. "Africa"[MeSH] OR "Africa South of the Sahara"[MeSH]  8. Africa*[tiab] OR [individual country names for all 54 African nations] OR "sub-Saharan Africa"[tiab] OR "North Africa"[tiab]  9. #7 OR #8  10. #3 AND #6 AND #9  11. Limit to English | **2847** |
| **SCOPUS** | ( TITLE-ABS-KEY ( "artificial intelligence" OR "machine learning" OR "deep learning" OR "neural network*" OR "random forest*" OR "support vector machine*" OR "gradient boosting" OR "predictive model*" OR "prediction model*" OR "forecasting" OR "computational intelligence" ) )  AND  ( TITLE-ABS-KEY ( "non-communicable disease*" OR "noncommunicable disease*" OR ncd OR ncds OR "cardiovascular disease*" OR hypertension OR "heart disease*" OR stroke OR diabetes OR cancer* OR neoplasm* OR "chronic respiratory disease*" OR copd OR asthma OR "disease burden" OR "mortality prediction" ) )  AND  ( TITLE-ABS-KEY ( africa* OR "south africa" OR kenya OR nigeria OR egypt OR ethiopia OR ghana OR uganda OR tanzania OR "democratic republic of congo" OR morocco OR algeria OR angola OR sudan OR mozambique OR madagascar OR cameroon OR "ivory coast" OR niger OR mali OR "burkina faso" OR malawi OR zambia OR senegal OR somalia OR chad OR zimbabwe OR guinea OR rwanda OR benin OR burundi OR tunisia OR "south sudan" OR togo OR "sierra leone" OR libya OR liberia OR mauritania OR "central african republic" OR eritrea OR gambia OR botswana OR namibia OR gabon OR lesotho OR "guinea-bissau" OR "equatorial guinea" OR mauritius OR eswatini OR djibouti OR reunion OR comoros OR "cape verde" OR "sao tome and principe" OR seychelles OR "sub-saharan africa" OR "north africa" ) )  AND  ( LIMIT-TO ( LANGUAGE , "English" ) | Results: 2,134 records |
| **Web of Science** | TS=("artificial intelligence" OR "machine learning" OR "deep learning" OR "neural network*" OR "random forest*" OR "support vector machine*" OR "gradient boosting" OR "predictive model*" OR "prediction model*" OR "forecasting model*" OR "computational intelligence" OR "ensemble learning")  AND  TS=("non-communicable disease*" OR "noncommunicable disease*" OR NCD OR NCDs OR "cardiovascular disease*" OR hypertension OR "heart disease*" OR stroke OR diabetes OR cancer* OR neoplasm* OR "chronic respiratory disease*" OR "chronic obstructive pulmonary disease" OR COPD OR asthma OR "disease burden" OR "mortality prediction" OR "morbidity prediction")  AND  TS=(Africa* OR "South Africa" OR Kenya OR Nigeria OR Egypt OR Ethiopia OR Ghana OR Uganda OR Tanzania OR "Democratic Republic of Congo" OR Morocco OR Algeria OR Angola OR Sudan OR Mozambique OR Madagascar OR Cameroon OR "Ivory Coast" OR Niger OR Mali OR "Burkina Faso" OR Malawi OR Zambia OR Senegal OR Somalia OR Chad OR Zimbabwe OR Guinea OR Rwanda OR Benin OR Burundi OR Tunisia OR "South Sudan" OR Togo OR "Sierra Leone" OR Libya OR Liberia OR Mauritania OR "Central African Republic" OR Eritrea OR Gambia OR Botswana OR Namibia OR Gabon OR Lesotho OR "Guinea-Bissau" OR "Equatorial Guinea" OR Mauritius OR Eswatini OR Djibouti OR Comoros OR "Cape Verde" OR "Sao Tome and Principe" OR Seychelles OR "sub-Saharan Africa" OR "North Africa")  AND  LA=(English) | Results: 1,923 records |
| **IEEE XPLORE** | ("All Metadata":"artificial intelligence" OR "All Metadata":"machine learning" OR "All Metadata":"deep learning" OR "All Metadata":"neural networks" OR "All Metadata":"random forest" OR "All Metadata":"support vector machine" OR "All Metadata":"predictive modeling")  AND  ("All Metadata":"non-communicable disease" OR "All Metadata":"cardiovascular disease" OR "All Metadata":"diabetes" OR "All Metadata":"cancer" OR "All Metadata":"chronic disease" OR "All Metadata":"disease burden" OR "All Metadata":"health forecasting")  AND  ("All Metadata":"Africa" OR "All Metadata":"South Africa" OR "All Metadata":"Kenya" OR "All Metadata":"Nigeria" OR "All Metadata":"Egypt" OR "All Metadata":"Ethiopia" OR "All Metadata":"Ghana" OR "All Metadata":"sub-Saharan Africa")  Filters:  - Content Type: Conference Publications, Journals  - Language: English | Results: 342 records |
| CINAHL | S1: (MH "Artificial Intelligence+") OR (MH "Machine Learning+") OR (MH "Neural Networks, Computer+")  S2: TI ( "artificial intelligence" OR "machine learning" OR "deep learning" OR "neural network*" OR "predictive model*" OR "random forest" OR "support vector machine" ) OR AB ( "artificial intelligence" OR "machine learning" OR "deep learning" OR "neural network*" OR "predictive model*" )  S3: S1 OR S2  S4: (MH "Chronic Disease+") OR (MH "Cardiovascular Diseases+") OR (MH "Diabetes Mellitus+") OR (MH "Neoplasms+")  S5: TI ( "non-communicable disease*" OR NCD OR "cardiovascular disease*" OR diabetes OR cancer OR hypertension OR "chronic respiratory disease" OR "disease burden" ) OR AB ( "non-communicable disease*" OR NCD OR "cardiovascular disease*" OR diabetes OR cancer OR "disease burden" )  S6: S4 OR S5  S7: (MH "Africa+")  S8: TI ( Africa* OR "South Africa" OR Kenya OR Nigeria OR Egypt OR Ethiopia OR Ghana OR Uganda OR Tanzania OR "sub-Saharan Africa" ) OR AB ( Africa* OR "South Africa" OR Kenya OR Nigeria OR Egypt OR Ethiopia )  S9: S7 OR S8  S10: S3 AND S6 AND S9  Limiters:  - Language: English  - Publication Year: 1990-2025 | Results: 289 records |
| EMBASE | ('artificial intelligence'/exp OR 'machine learning'/exp OR 'deep learning'/exp OR 'neural network'/exp OR 'artificial intelligence':ti,ab OR 'machine learning':ti,ab OR 'deep learning':ti,ab OR 'neural network*':ti,ab OR 'random forest*':ti,ab OR 'support vector machine*':ti,ab OR 'predictive model*':ti,ab OR 'prediction model*':ti,ab OR 'forecasting':ti,ab)  AND  ('chronic disease'/exp OR 'cardiovascular disease'/exp OR 'diabetes mellitus'/exp OR 'cancer'/exp OR 'non-communicable disease':ti,ab OR 'noncommunicable disease':ti,ab OR ncd:ti,ab OR 'cardiovascular disease*':ti,ab OR hypertension:ti,ab OR diabetes:ti,ab OR cancer*:ti,ab OR 'chronic respiratory disease':ti,ab OR copd:ti,ab OR 'disease burden':ti,ab OR 'mortality prediction':ti,ab)  AND  ('Africa'/exp OR 'South Africa'/exp OR 'Kenya'/exp OR 'Nigeria'/exp OR 'Egypt'/exp OR 'Ethiopia'/exp OR africa*:ti,ab OR 'south africa':ti,ab OR kenya:ti,ab OR nigeria:ti,ab OR egypt:ti,ab OR ethiopia:ti,ab OR ghana:ti,ab OR uganda:ti,ab OR tanzania:ti,ab OR 'sub-saharan africa':ti,ab)  AND  [english]/lim  AND  [embase]/lim NOT [medline]/lim | Results: 1,156 records |
| AFRICAN JOURNALS ONLINE (AJOL) | Field 1: Title/Abstract  Terms: "artificial intelligence" OR "machine learning" OR "predictive model" OR "forecasting"  AND  Field 2: Title/Abstract  Terms: "non-communicable disease" OR "cardiovascular" OR "diabetes" OR "cancer" OR "chronic disease" OR "disease burden"  Filters:  - All subject areas  - All years  - All African countries  Simple Search (complementary):  "machine learning" AND "disease prediction"  "artificial intelligence" AND "health forecasting"  "predictive modelling" AND "NCD" | Results: 156 records |
| GOOGLE SCHOLAR | "artificial intelligence" OR "machine learning" "non-communicable disease" OR "NCD" OR "cardiovascular disease" OR "diabetes" "forecasting" OR "prediction" Africa  Filters Applied:  - Sort by: Relevance  - Language: English  - Date range: Any time  - Exclude patents and citations  Selection Criteria:  - First 200 results reviewed  - Filtered for peer-reviewed articles, conference proceedings, and grey literature  - Excluded books, news articles, and non-research content | Results: 65 relevant records (from 200 screened) |
